# Supplementary material
Source: HighWire-hosted journal article supplement (https://sti.bmj.com/content/95/6/428)
Supplement: inline-supplementary-material-5 [file inline-supplementary-material-5.pdf]

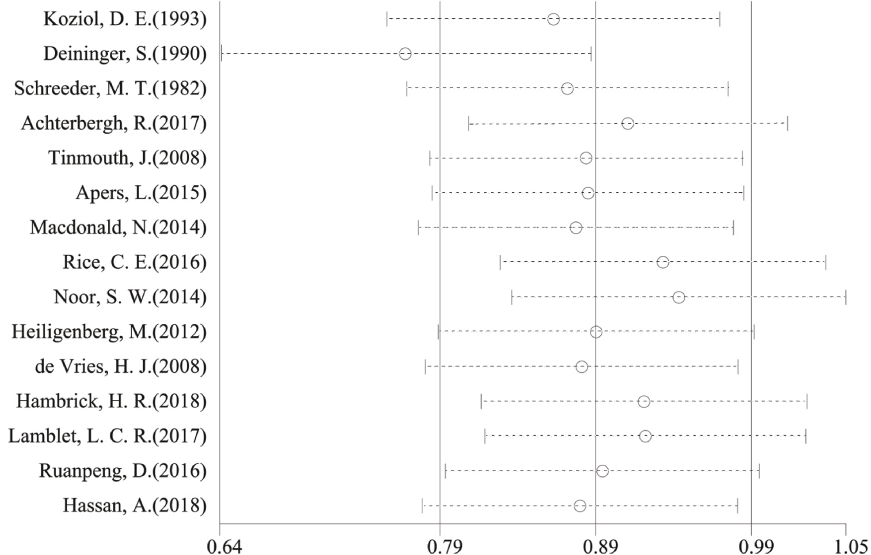

Figure S4 Sensitivity analysis of odds ratio for sexually transmitted infections other than HIV comparing MSM who do and do not practice rectal douching
